# Supplementary material for: Phosphorescence switch and logic gate of iridium(iii) complexes containing a triarylboron moiety triggered by fluoride and an electric field
Source: Royal Society of Chemistry journal article supplement (doi:10.1039/c4tc02457e), 2014-12-09
Supplement: c4tc02457e1.pdf [file c4tc02457e1.pdf]

## Supporting Information

### **Phosphorescence switch and logic gate of iridium(III) complexes containing triarylboron moiety triggered by fluoride and electric field**

Wenpeng Lin,<sup>a</sup> Qi Tan,<sup>a</sup> Hua Liang,<sup>a</sup> Kenneth Yin Zhang,<sup>a</sup> Shujuan Liu,<sup>a</sup> Rui Jiang,<sup>a</sup> Rongrong Hu,<sup>a</sup> Wenjuan Xu,<sup>a</sup> Qiang Zhao\*<sup>a</sup> and Wei Huang\*<sup>ab</sup>

<sup>a</sup> *Key Laboratory for Organic Electronics and Information Displays & Institute of Advanced Materials, Jiangsu National Synergetic Innovation Center for Advanced Materials (SICAM), Nanjing University of Posts & Telecommunications (NUPT), Nanjing 210023, P.R. China E-mail: iamqzhao@njupt.edu.cn.*

<sup>b</sup> *Key Laboratory of Flexible Electronics (KLOFE) & Institute of Advanced Materials (IAM), Jiangsu National Synergistic Innovation Center for Advanced Materials (SICAM), Nanjing Tech University (NanjingTech), Nanjing 211816, P.R. China E-mail: wei-huang@njtech.edu.cn.*

## Experimental section

**Materials.** Unless otherwise stated, all starting materials and reagents were purchased from commercial suppliers and were used without further purification. CH<sub>3</sub>CN was dried under reflux over CaH<sub>2</sub> for several hours at 70-75 °C, distilled at these conditions and used freshly.

**Measurements.** NMR spectra were recorded on a Bruker Ultra Shield Plus 400 MHz NMR instrument. Mass spectra were obtained on a Bruker autoflex matrix-assisted laser desorption ionization time-of-flight (MALDI-TOF/TOF) mass spectrometer. The UV-visible absorption spectra were recorded on a Shimadzu UV-3600 UV-VIS-NIR spectrophotometer. Photo-luminescence spectra were recorded on an Edinburgh FL920 spectrofluorometer system.

### Synthesis.

**2-[4-(Dimesitylboryl)phenyl]quinoline (Bpq):** This compound was synthesized by using a reported procedure.<sup>1</sup>

**[(Bpq)<sub>2</sub>Ir(Phen)]PF<sub>6</sub>:** [(Bpq)<sub>2</sub>Ir(Phen)]PF<sub>6</sub> was synthesized through a standard two-step procedure according a reported method.<sup>2</sup> A mixture of IrCl<sub>3</sub>•3H<sub>2</sub>O (0.56 mmol) and Bpq (1.12 mmol) in 2-ethoxyethanol/water (8 mL, 3:1 v/v) was heated to reflux under nitrogen atmosphere for 24 h. Next, upon cooling to room temperature, the mixture was added large amounts of water and filtered. Then the residue was dried to give the crude cyclometalated Ir(III) chloro-bridged dimer ([[(Bpq)<sub>2</sub>Ir(μ-Cl)<sub>2</sub>Ir(Bpq)<sub>2</sub>]). Then a mixture of [[(Bpq)<sub>2</sub>Ir(μ-Cl)<sub>2</sub>Ir(Bpq)<sub>2</sub>] (0.06 mmol) and ligand 1,10-phenanthroline (Phen) (0.12 mmol) in CH<sub>2</sub>Cl<sub>2</sub>/MeOH (12 mL, 2:1 v/v) was refluxed under N<sub>2</sub> for 12 h. The solution was then cooled to room temperature and solid KPF<sub>6</sub> (0.60 mmol) was added. The mixture was stirred for 4 h, filtered to remove any insoluble inorganic salts, and evaporated to dryness under reduced pressure. The crude product was purified with column chromatography on silica gel with CH<sub>2</sub>Cl<sub>2</sub>/acetone (20:1) as the eluent to afford an orange solid in 64% yield. <sup>1</sup>H NMR (400 MHz, CDCl<sub>3</sub>-d<sub>3</sub>) δ ppm 8.53 (dd, *J* = 8.3, 1.2 Hz, 2H), 8.49 (dd, *J* = 5.0, 1.2 Hz, 2H), 7.96 (dd, *J* = 18.5, 8.8 Hz, 4H), 7.91 (s, 2H), 7.89 (d, *J* = 8.0 Hz, 2H), 7.84 (dd, *J*

= 8.2, 5.1 Hz, 2H), 7.48 (d,  $J$  = 7.1 Hz, 2H), 7.29 (dd,  $J$  = 7.9, 0.8 Hz, 2H), 7.17 (t,  $J$  = 7.5 Hz, 2H), 6.93 (d,  $J$  = 8.9 Hz, 2H), 6.68 (ddd,  $J$  = 8.6, 6.9, 1.3 Hz, 2H), 6.48 (s, 8H), 6.35 (s, 2H), 2.23 (s, 12H), 1.64 (s, 24H). MS (MALDI-TOF): [M-PF<sub>6</sub>] m/e: calcd.: 1277.54; found: 1277.61.

**(Bpq)<sub>2</sub>Ir(pymz):** A mixture of [(Bpq)<sub>2</sub>Ir(μ-Cl)<sub>2</sub>Ir(Bpq)<sub>2</sub>] (0.06 mmol), ligand 2-(pyridin-2-yl)-1*H*-benzo[*d*]imidazole (H-pymz) (0.12 mmol) and potassium carbonate (K<sub>2</sub>CO<sub>3</sub>) (0.24 mmol) in DMF (6 mL) was refluxed under N<sub>2</sub> for 24 h. Next, upon cooling to room temperature, the mixture was added large amounts of water (50 mL) and filtered. The residue was washed with water and extracted with DCM. Then the combined organic phase was dried with anhydrous MgSO<sub>4</sub>, filtrated and removed in vacuo. The crude product was purified with column chromatography on silica gel to afford an orange solid in 33% yield. <sup>1</sup>H NMR (400 MHz, CDCl<sub>3</sub>-*d*<sub>3</sub>) δ ppm 8.22 (dd,  $J$  = 8.8, 9.6 Hz, 2H), 8.15-8.04(m, 4H), 8.02(d,  $J$  = 8.0 Hz, 1H), 7.96-7.86(m, 2H), 7.76-7.65(m, 3H), 7.47-7.31(m, 3H), 7.22(t,  $J$  = 8.4 Hz, 2H), 7.03(t,  $J$  = 8.8 Hz, 2H), 6.98-6.85(m, 2H), 6.71-6.62(m, 1H), 6.50-6.39(m, 9H), 6.33(dd,  $J$  = 8.0, 8.0 Hz, 3H), 2.2(s, 12H), 1.59(s, 24H). MS (MALDI-TOF): [M-PF<sub>6</sub>] m/e: calcd.: 1291.54; found: 1291.98.

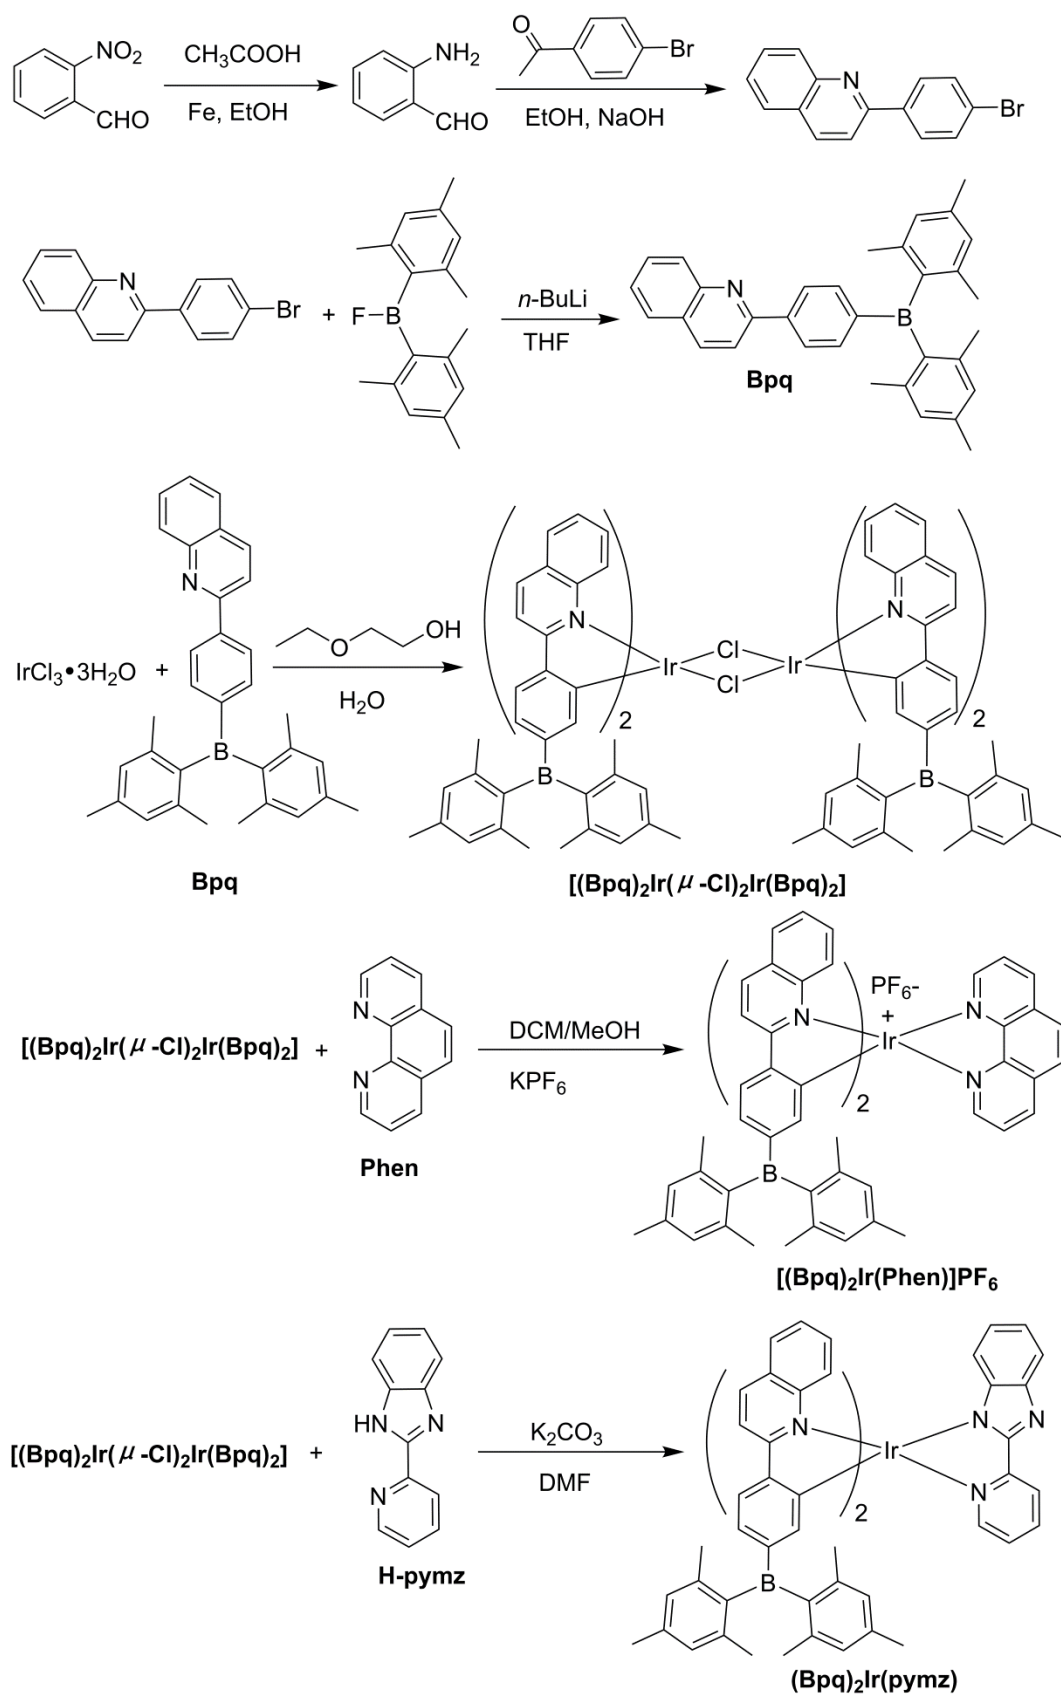

**Scheme S1.** Synthesis of ligand Bpq and complexes [(Bpq)<sub>2</sub>Ir(Phen)]PF<sub>6</sub> and (Bpq)<sub>2</sub>Ir(pymz).

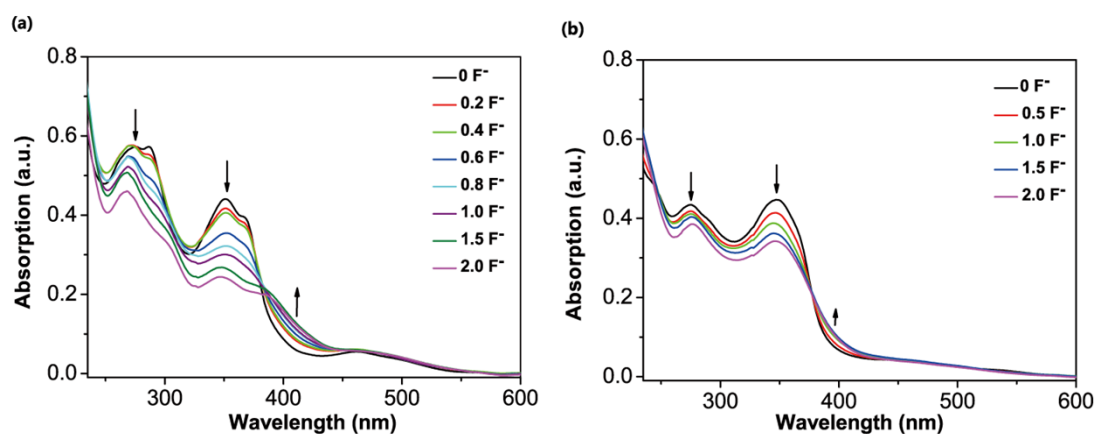

**Fig. S1** The UV/vis absorption spectra of complexes (a)  $[(\text{Bpq})_2\text{Ir}(\text{Phen})]\text{PF}_6$  and (b)  $(\text{Bpq})_2\text{Ir}(\text{pymz})$  ( $10^{-5}$  M in  $\text{CH}_3\text{CN}$ ) upon titration of TBAF (2 equiv.).

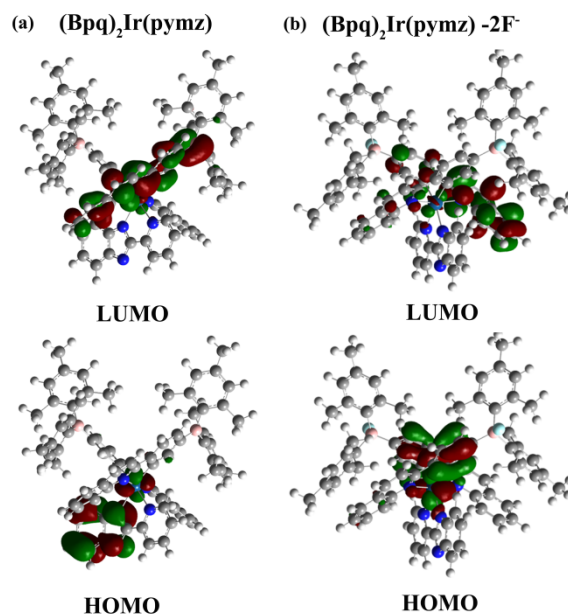

**Fig. S2** Orbital distributions of (a)  $(\text{Bpq})_2\text{Ir}(\text{pymz})$  and (b)  $(\text{Bpq})_2\text{Ir}(\text{pymz})-2\text{F}^-$ .

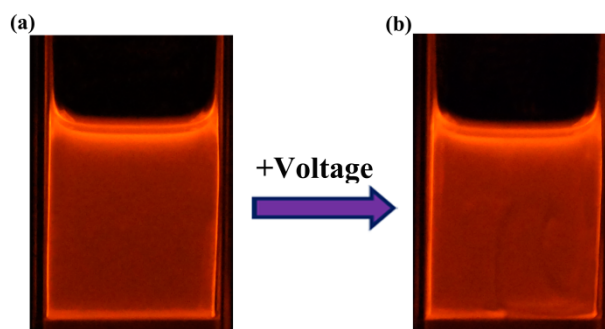

**Fig. S3** Photographs of  $[(\text{Bpq})_2\text{Ir}(\text{Phen})]\text{PF}_6$  in  $\text{CH}_3\text{CN}$  ( $10^{-4}$  M) without (a) and with (b) electrical stimuli under a UV lamp.

- 1 (a) R. Stahl, C. Lambert, C. Kaiser, R. Wortmann and R. Jakober, *Chem. Eur. J.*, 2006, **12**, 2358; (b) W. J. Xu, S. J. Liu, X. Y. Zhao, S. Sun, S. Cheng, T. C. Ma, H. B. Sun, Q. Zhao and W. Huang, *Chem. Eur. J.*, 2010, **16**, 7125.
- 2 Q. Zhao, F. Y. Li, S. J. Liu, M. X. Yu, Z. Q. Liu, T. Yi and C. H. Huang, *Inorg. Chem.*, 2008, **47**, 9256.
